# Supplementary material for: Efficient Synthesis with Green Chemistry Approach of Novel Pharmacophores of Imidazole-Based Hybrids for Tumor Treatment: Mechanistic Insights from In Situ to In Silico
Source: MDPI journal article supplement (doi:10.3390/cancers14205079), 2022-10-17
Supplement: s1 [file s1]

## Supporting Information

# Efficient Synthesis with Green Chemistry Approach of Novel Pharmacophores of Imidazole-Based Hybrids for Tumor Treatment: Mechanistic Insights from In Situ to In Silico

Majid Khan <sup>1,2,†</sup>, Syed Raza Shah <sup>1</sup>, Faizullah Khan <sup>1,3,†</sup>, Sobia Ahsan Halim <sup>1</sup>,  
Shaikh Mizanoor Rahman <sup>1</sup>, Mohammad Khalid <sup>4</sup>, Ajmal Khan <sup>1,\*</sup>, Ahmed Al-Harrasi <sup>1,\*</sup>

<sup>1</sup> Natural and Medical Sciences Research Center, University of Nizwa, 616 Birkat Al Mauz, Nizwa P.O. Box 33, Oman

<sup>2</sup> H.E.J. Research Institute of Chemistry, International Center for Chemical and Biological Sciences, University of Karachi, Karachi 75270, Pakistan

<sup>3</sup> Department of Pharmacy, Abdul Wali Khan University Mardan, Mardan 23200, Pakistan

<sup>4</sup> Department of Pharmaceutics, College of Pharmacy, King Khalid University, Abha 62529, Saudi Arabia

\* Correspondence: ajmalkhan@unizwa.edu.om (A.K.); aharrasi@unizwa.edu.om (A.A.-H.)

† These authors contributed equally to this work.

**Table S1.** The binding interactions of Compounds in the Active site of hCA-IX and hCA-II.

| Compounds | Score | Ligand atom | Receptor atom | Bond type | Bond length (Å) |
|-----------|-------|-------------|---------------|-----------|-----------------|
| hCA-IX    |       |             |               |           |                 |
| 1         | -3.93 | N10         | ND1-HIS200    | HBA       | 2.90            |
|           |       | O15         | O-HOH603      | HBA       | 2.87            |
|           |       | O17         | NH2-ARG196    | HBA       | 2.61            |
|           |       | O17         | NH1-ARG196    | Ionic     | 3.78            |
| 3         | -3.49 | N5          | OE1-GLN203    | HBD       | 3.14            |
|           |       | O14         | HE2-GLN224    | HBA       | 3.02            |
|           |       | O14         | O-HOH603      | HBA       | 2.00            |
|           |       | N7          | O-HOH664      | HBA       | 1.68            |
|           |       |             | O-HOH686      | HBA       | 1.36            |
| 4         | -3.77 | S15         | O-HOH664      | HBA       | 3.87            |
|           |       | O14         | ND1-HIS200    | Ionic     | 3.45            |
|           |       | N13         | NH2-ARG196    | HBA       | 2.30            |
|           |       | O2          | O-HOH603      | HBD       | 2.19            |
| 7         | -3.92 | O18         | NH2-ASN198    | HBA       | 2.71            |
|           |       | O17         | NE1-TRP141    | HBA       | 2.87            |
|           |       | N1          | OE2-GLN203    | HBD       | 2.44            |
|           |       | O18         | O-HOH664      | HBD       | 1.98            |
|           |       | N1          | O-HOH552      | HBD       | 2.61            |
| 8         | -3.74 | N11         | ND1-HIS200    | HBA       | 3.16            |
|           |       | O18         | NH2-ARG196    | HBA       | 2.63            |
|           |       | O18         | NH1-ARG196    | Ionic     | 3.85            |
|           |       | O18         | NH2-ARG196    | Ionic     | 2.63            |
|           |       | 6-ring      | NE2-HIS140    | $\pi$ -H  | 2.89            |
| 9         | -3.92 | O8          | NH2-ARG196    | HBA       | 2.43            |
|           |       | O16         | ND1-HIS200    | HBA       | 2.96            |
|           |       | N11         | HOH603        | HBA       | 1.74            |
| 10        | -3.93 | O18         | NH2-ARG196    | HBA       | 2.66            |
|           |       | O18         | NH1-ARG196    | Ionic     | 3.94            |
|           |       | O18         | NH2-ARG196    | Ionic     | 2.66            |
| 11        | -3.66 | O7          | ND1-HIS200    | HBA       | 3.50            |

|               |       |        |            |          |      |
|---------------|-------|--------|------------|----------|------|
|               |       | O26    | O-HOH664   | HBA      | 3.14 |
|               |       | 6-ring | NE2-GLN203 | $\pi$ -H | 2.85 |
| <b>hCA-II</b> |       |        |            |          |      |
| <b>1</b>      | -4.97 | O15    | ZN-262     | Metallic | 2.37 |
|               |       | O3     | HD2-ASN62  | HBA      | 3.12 |
|               |       | O15    | NE2-HIS94  | HBA      | 3.01 |
| <b>2</b>      | -5.03 | N-10   | NE2-GLN92  | HBA      | 3.39 |
|               |       | 6-ring | ND2-ASN62  | $\pi$ -H | 2.83 |
|               |       | O8     | HG1-THR200 | HBA      | 3.78 |
| <b>3</b>      | -4.35 | N5     | O-HOH370   | HBD      | 3.64 |
|               |       | N10    | N-THR199   | HBA      | 3.13 |
|               |       | O15    | ND2-ASN62  | HBA      | 2.62 |
|               |       | O15    | ND2-ASN67  | HBA      | 2.98 |
| <b>4</b>      | -4.29 | N12    | OD1-ASN67  | HBD      | 3.22 |
|               |       | O7     | ND2-ASN62  | HBA      | 3.19 |
|               |       | S15    | N-THR199   | HBA      | 3.14 |
|               |       | S15    | OG1-THR199 | HBA      | 4.02 |
| <b>9</b>      | -4.58 | O16    | O-PRO201   | HBD      | 3.06 |
|               |       | S7     | N-THR199   | HBA      | 3.74 |
|               |       | O8     | OG1-THR200 | HBA      | 2.42 |

HBA = Hydrogen bond acceptor, HBD = Hydrogen bond donor.
